# Supplementary material
Source: publisher site journal article supplement (https://www.dovepress.com/article/339058)
Supplement: Supplementary file 1 [file get_supplementary_file.php]

**Supplementary**

| **Table 1.** Demographic, Clinical and Conventional Laboratory Data for Patients with Positive Leptospira PCR | | | | | | |
| --- | --- | --- | --- | --- | --- | --- |
| s | | | | | | |
| BOX [1] | Age | Sex | Date of Admission | Date of Onset | Date of LP | Date of Discharge |
| Patient 1 | 5 months | Males | 09 Jan 2010 | 08 Jan 2010 | 09 Jan 2010 | 19 Jan 2010 |
| Patient 2 | 4 years | Males | 17 Jan 2010 | 16 Jan 2010 | 17 Jan 2010 | 27 Jan 2010 |
| Patient 3 | 1.2 years | Males | 25 Feb 2010 | 21 Feb 2010 | 27 Feb 2010 | 04 Mar 2010 |
| Patient 4 | 3 months | Males | 14 Mar 2010 | 10 Mar 2010 | 15 Mar 2010 | 24 Mar 2010 |
| Patient 5 | 6 months | Males | 11 Apr 2010 | 11 Apr 2010 | 11 Apr 2010 | 21 Apr 2010 |
| Patient 6 | 8 months | Males | 19 Mar 2010 | 19 Mar 2010 | 20 Mar 2010 | 22 Mar 2010 |
| Patient 7 | 6 months | Males | 30 Mar 2010 | 26 Mar 2010 | 31 Mar 2010 | Missing |
| Patient 8 | Missing | Males | Missing | Missing | Missing | Missing |
| Patient 9 | 3 months | Males | 08 May 2010 | 07 May 2010 | 08 May 2010 | 15 May 2010 |
| BOX [2] | fever | Seizures | Stiff Neck | Vomiting | Bulging Fontanelle | Chills |
| Patient 1 | Yes | Yes | No | No | No | No |
| Patient 2 | Yes | No | No | No | No | No |
| Patient 3 | Yes | Yes | No | Yes | No | Yes |
| Patient 4 | Yes | Yes | No | Yes | No | No |
| Patient 5 | Yes | Yes | Yes | Yes | Yes | No |
| Patient 6 | Yes | Yes | No | Yes | No | No |
| Patient 7 | Yes | Yes | Yes | No | Yes | No |
| Patient 8 | Missing | Missing | Missing | Missing | Missing | Missing |
| Patient 9 | Yes | Yes | Yes | Yes | No | No |
| BOX [3] | CSF Appearance | WBCs Count | CSF Glucose | CSF Proteins | CSF Gram Stain | CSF Culture |
| Patient 1 | Turbid | 26000 (70%N) | 29 mg/dl | 499 mg/dl | Gram +ve cocci in clusters | *Streptococcus pneumoniae* |
| Patient 2 | Turbid | 7800 | 77 mg/dl | 106 mg/dl | No organism seen | No Growth |
| Patient 3 | Clear | No cells seen | 67 mg/dl | 9 mg/dl | No organism seen | No Growth |
| Patient 4 | Clear | No cells seen | 54 mg/dl | 30 mg/dl | No organism seen | No Growth |
| Patient 5 | Turbid | 1300 | 15 mg/dl | 875 mg/dl | No organism seen | No Growth |
| Patient 6 | Traumatic | Not Performed | Not Performed | Not Performed | No organism seen | No Growth |
| Patient 7 | Turbid | 5000 (68%N) | 10 mg/dl | 183 mg/dl | No organism seen | No Growth |
| Patient 8 | Missing | Missing | Missing | Missing | Missing | Missing |
| Patient 9 | Traumatic | Not Performed | Not Performed | Not Performed | No organism seen | No Growth |
| BOX [4] | First Line | Second Line | Other Antibiotics | Complications | Outcome | Hospital Diagnosis |
| Patient 1 | Ampicillin | Other | Samixon | None | Discharged | Septic Meningitis |
| Patient 2 | Ampicillin | Other | Samixon | None | Discharged | Septic Meningitis |
| Patient 3 | Penicillin | Chloramphenicol | None | None | Discharged | Septic Meningitis |
| Patient 4 | Ampicillin | Cephalosporin | None | None | Discharged | Septic Meningitis |
| Patient 5 | Unwritten | Unwritten | None | None | Discharged | Septic Meningitis |
| Patient 6 | Ampicillin | Unwritten | None | None | Discharged | Other (Tonsillitis) |
| Patient 7 | Penicillin | Cephalosporin | None | None | Discharged | Septic Meningitis |
| Patient 8 | Unwritten | Unwritten | None | None | Discharged | Septic Meningitis |
| Patient 9 | Cephalosporin | Other | Quinine | None | Discharged | Other (Severe Pneumonia) |
| *- Other signs and symptoms of meningeal irritation (petechiae, altered mental status, photophobia, coma and headache (for ˃ 1 year olds)) were investigated but not detected. Bulging fontanelle is for ≤ 18 months olds.* | | | | | | |
| *- Months January and February are the Winter Season, Months March to May are the Summer Season.* | | | | | | |
| *- CSF specimens that were traumatic were not tested for CSF cell count, glucose and proteins concentrations.* | | | | | | |
| *- CSF WBCs Count is in cells/mm3. Between brackets is the predominant WBC type percentage. When no cells are seen in CSF this is considered as ˂5 cells/mm3.* | | | | | | |
| *- CSF glucose level is considered as Low when it is < 45 mg/dl, High when it is > 100 mg/dl and Normal when it is between 45 and 100 mg/dl. CSF proteins level is considered as Low when it is < 14 mg/dl, High when it is > 45 mg/dl and Normal when it is between 14 and 45 mg/dl.* | | | | | | |
| *- CSF culture is conducted for routinely tested rapid growing bacteria that can grow on ordinary agar-based culture media.* | | | | | | |
| *- Most data on Patient (8) are missing.* | | | | | | |
| *- The first 3 variables in Box [4] describe the first and second line (and additional) antibiotic therapies prescribed during hospitalization.* | | | | | | |
| *- Some data are missing and are indicated as ‘’Missing’’.* | | | | | | |
